1 **Genomic variation across a clinical *Cryptococcus* population linked to disease**  
2 **outcome**

3

4 Running title: Variants and virulence in *C. neoformans*

5

6 Poppy Sephton-Clark<sup>1</sup>, Jennifer L. Tenor<sup>2</sup>, Dena L. Toffaletti<sup>2</sup>, Nancy Meyers<sup>2</sup>, Charles  
7 Giamberardino<sup>2</sup>, Síle F. Molloy<sup>3,4</sup>, Adrienne Chan<sup>5</sup>, Tarsizio Chikaonda<sup>8</sup>, Robert  
8 Heyderman<sup>6</sup>, Mina Hosseinipour<sup>7</sup>, Newton Kalata<sup>8</sup>, Cecilia Kanyama<sup>7</sup>, Christopher  
9 Kukacha<sup>8</sup>, Duncan Lupiya<sup>9</sup>, Henry C. Mwandumba<sup>8</sup>, Thomas Harrison<sup>3,4</sup>, Tihana  
10 Bicanic<sup>3,4</sup>, John R. Perfect<sup>2</sup>, and Christina A. Cuomo\*<sup>1</sup>

11

12 <sup>1</sup>Infectious Disease and Microbiome Program, Broad Institute of MIT and Harvard,  
13 Cambridge MA 02142 USA. <sup>2</sup>Division of Infectious Diseases, Department of Medicine,  
14 Duke University School of Medicine, Durham, NC 27710, USA. <sup>3</sup>Centre for Global  
15 Health, Institute of Infection and Immunity, St George's University of London, London,  
16 United Kingdom. <sup>4</sup>Clinical Academic Group in Infection, St George's University Hospital,  
17 London, United Kingdom. <sup>5</sup>Sunnybrook Health Sciences Centre, Toronto, Canada.  
18 <sup>6</sup>Division of Infection and Immunity, UCL, London, United Kingdom. <sup>7</sup>UNC Project  
19 Malawi, University of North Carolina, USA. <sup>8</sup>Malawi-Liverpool-Wellcome Trust Clinical  
20 Research Programme, Blantyre, Malawi. <sup>9</sup>Dignitas International, Zomba, Malawi.

21

22 \*Address correspondence to: Christina A. Cuomo ([cuomo@broadinstitute.org](mailto:cuomo@broadinstitute.org))

23 **Abstract**

24 *Cryptococcus neoformans* is the causative agent of cryptococcosis, a disease with poor  
25 patient outcomes, accounting for approximately 180,000 deaths each year. Patient  
26 outcomes may be impacted by the underlying genetics of the infecting isolate, however,  
27 our current understanding of how genetic diversity contributes to clinical outcomes is  
28 limited. Here, we leverage clinical, in vitro growth and genomic data for 284 *C.*  
29 *neoformans* isolates to identify clinically relevant pathogen variants within a population  
30 of clinical isolates from patients with HIV-associated cryptococcosis in Malawi. Through

31 a genome-wide association study (GWAS) approach, we identify variants associated  
32 with fungal burden and growth rate. We also find both small and large-scale variation,  
33 including aneuploidy, associated with alternate growth phenotypes, which may impact  
34 the course of infection. Genes impacted by these variants are involved in transcriptional  
35 regulation, signal transduction, glycolysis, sugar transport, and glycosylation. When  
36 combined with clinical data, we show that growth within the CNS is reliant upon  
37 glycolysis in an animal model, and likely impacts patient mortality, as CNS burden  
38 modulates patient outcome. Additionally, we find genes with roles in sugar transport are  
39 under selection in the majority of these clinical isolates. Further, we demonstrate that  
40 two hypothetical proteins identified by GWAS impact virulence in animal models. Our  
41 approach illustrates links between genetic variation and clinically relevant phenotypes,  
42 shedding light on survival mechanisms within the CNS and pathways involved in this  
43 persistence.

#### 44 **Importance**

45 Infection outcomes for cryptococcosis, most commonly caused by *C. neoformans*, are  
46 influenced by host immune responses, as well as host and pathogen genetics. Infecting  
47 yeast isolates are genetically diverse, however, we lack a deep understanding of how  
48 this diversity impacts patient outcomes. To better understand both clinical isolate  
49 diversity and how diversity contributes to infection outcome, we utilize a large collection  
50 of clinical *C. neoformans* samples, isolated from patients enrolled in a clinical trial  
51 across 3 hospitals in Malawi. By combining whole-genome sequence data, clinical data,  
52 and in vitro growth data, we utilize genome-wide association approaches to examine the  
53 genetic basis of virulence. Genes with significant associations show virulence  
54 phenotypes in both murine and rabbit models, demonstrating that our approach  
55 successfully identifies links between genetic variation and biologically significant  
56 phenotypes.

#### 57 **Introduction**

58 *Cryptococcus neoformans* is a pathogenic yeast that most commonly affects  
59 immunocompromised individuals, causing an estimated 180,000 deaths annually, with

60 75% of these occurring in sub-Saharan Africa. One of the leading causes of death in  
61 adults living with HIV/AIDS, cryptococcal infections are especially problematic in low-  
62 income countries where, despite a widespread roll-out of antiretroviral therapy, deaths  
63 due to opportunistic infections such as cryptococcal meningitis remain high (1). The  
64 infecting propagules of this pathogen generally enter human hosts via inhalation. From  
65 infections within the lung, *C. neoformans* may disseminate throughout the bloodstream  
66 and central nervous system of susceptible patients, causing meningitis (2). In a sample  
67 of healthcare systems across low-income countries, the 1-year mortality rate for  
68 individuals who develop cryptococcal meningitis is estimated to be 70% for those in  
69 care (uncertainty interval 59–81%) (1). A better understanding of *C. neoformans* strain  
70 virulence and fitness within the host is necessary to improve patient outcomes and  
71 develop new treatment options.

72

73 Whilst the majority of cryptococcosis cases are caused by *Cryptococcus neoformans*  
74 *var grubii* (3), there are often high levels of genetic diversity within clinical populations of  
75 *C. neoformans* (4–7). Furthermore, isolates of the same multilocus sequence type  
76 (MLST) have been shown to cause infections that range in severity from mild to extreme  
77 (8). To examine how genetic variation contributes to virulence phenotypes, a recent  
78 study carried out logistic regression analysis with 38 clinical *C. neoformans* isolates of  
79 the same sequence type to identify single nucleotide polymorphisms (SNPs) associated  
80 with patient survival, clinical parameters including cytokine response, immune cell  
81 counts and infection clearance, as well as in vitro data on absolute yeast growth and  
82 macrophage interactions (9). This study identified 40 candidate genes based on these  
83 association parameters, 6 of which (out of 17 genes tested) were important for survival  
84 in a murine model of *C. neoformans* infection. In a larger cohort of 230 *C. neoformans*  
85 samples from patients in South Africa, isolate sequence type was associated with  
86 patient outcome, in vitro cerebrospinal fluid (CSF) survival, and phagocytosis response  
87 (10). Full scale genome-wide association studies (GWAS) have also examined how  
88 natural variation within a *C. neoformans* population differentiates clinical and  
89 environmental isolates, identifying loss-of-function variants present in clinical *C.*

90 *neoformans* (VNB) populations that impact a transcription factor important for  
91 melanization, a well-studied virulence factor (11).

92

93 Furthermore, copy number variation, such as aneuploidy, has also been frequently  
94 identified within clinical populations of *C. neoformans*. Disomy of chromosome 1 is  
95 commonly reported for isolates exposed to azoles, and the higher copy number of two  
96 key genes, the *AFR1* transporter and the *ERG11* drug target, confer increased  
97 resistance to antifungals such as fluconazole (12–14). Chromosome duplication as a  
98 result of in vivo passage has also been noted in clinical isolates (15–17), and the  
99 emergence of aneuploidy in this setting has been proposed as a mechanism by which  
100 both *Cryptococcus* and *Candida* species might rapidly adapt to high-stress  
101 environments (18, 19). In *C. neoformans* aneuploidy is often transient and passage  
102 under non-selective conditions allows for reversion to euploidy (14, 17). In total,  
103 aneuploidy of chromosomes 1, 2, 4, 6, 8, 9, 10, 12, 13, and 14 have been reported in *C.*  
104 *neoformans* (14, 16, 17, 20–23). Despite appearing consistently throughout clinical  
105 populations, the impact of these other chromosomal aneuploidies is not yet well  
106 understood.

107

108 To better understand how genetic variation among *C. neoformans* isolates contributes  
109 to infection outcomes in patients, we carried out genome-wide association studies  
110 (GWAS) with 266 *C. neoformans* clinical isolates from the VNI lineage, selected to  
111 reduce the confounding effects of population structure between lineages. In addition to  
112 comparing selected clinical data, all isolates were also measured for in vitro growth  
113 under diverse conditions. Through our GWAS approach, we identify two hypothetical  
114 proteins associated with fungal burden in patients which also contribute to virulence in a  
115 murine model. Additionally, we show that growth in a rabbit model of CNS infection is  
116 dependent on glycolytic genes identified by GWAS, and corroborate findings that patient  
117 outcome is highly correlated with fungal burden in the CNS. Partial and full  
118 chromosomal duplications are commonly detected within this clinical population, yet  
119 these aneuploidies reduce *C. neoformans* fitness under in vitro growth conditions.

120

## 121 **Materials and Methods**

### 122 **Sample Preparation and Sequencing**

123 Clinical cryptococcal isolates derived from patient CSF subculture were procured  
124 through the Antifungal Combinations for Treatment of Cryptococcal Meningitis in Africa  
125 Trial (ACTA) (24); repeat cultures and duplicates were excluded. Collected strains were  
126 grown overnight in 10 ml of YPD at 30°C and 225 rpm. Genomic DNA was then  
127 extracted for sequencing with the MasterPure Yeast DNA Purification Kit, as described  
128 by Desjardins et al. (11). DNA was sheared to 250bp using a Covaris LE instrument,  
129 and adapted for Illumina sequencing as described by Fisher et al. (25). Libraries were  
130 sequenced on a HiSeq X10, generating 150bp paired reads (minimum average  
131 coverage 100x).

132

### 133 **Data Processing and Variant Calling**

134 To determine sample species, reads were first aligned to a composite pan-  
135 *Cryptococcus* genome, consisting of reference genomes for *Cryptococcus neoformans*  
136 *var. grubii* H99, *Cryptococcus neoformans var. neoformans* JEC21, and representative  
137 genomes for lineages VGI, VGII, VGIIIa, VGIIIb, VGIV, and VGV of *Cryptococcus gattii*  
138 (26–29). To identify variants for *C. neoformans* species, reads were aligned to the  
139 *Cryptococcus neoformans var grubii* H99 reference genome (GCA\_000149245.3) (27)  
140 with BWA-MEM version 0.7.17 (30). GATK v4 variant calling was carried out as  
141 documented in our publicly available cloud-based pipeline (31)  
142 (<https://github.com/broadinstitute/fungal-wdl/tree/master/gatk4>). Post calling, variants  
143 were filtered on the following parameters: QD < 2.0, QUAL < 30.0, SOR > 3.0, FS >  
144 60.0 (indels > 200), MQ < 40.0, GQ < 50, alternate allele percentage = 0.8, DP < 10.  
145 Variants were annotated with SNPeff, version 4.3t (32).

146

### 147 **Population Genomic Analysis**

148 A maximum likelihood phylogeny was estimated using 72,258 segregating SNP sites  
149 present in one or more isolates, allowing ambiguity in a maximum of 10% of samples,  
150 with RAxML version 8.2.12 GTRCAT rapid bootstrapping (33), and visualized with  
151 ggtree (R 3.6.0) rooted to VNII isolates. To estimate linkage disequilibrium (LD) decay,

152 vcftools version 0.1.16 was used to calculate LD for 1000bp windows, with a minimum  
153 minor allele frequency of 0.1, and the --hap-r2 option. Region deletions and duplications  
154 were identified using CNVnator v0.3 (significant instance e value < 0.01) (34). To  
155 identify regions under selection, composite likelihood ratio analysis was performed with  
156 PopGenome (R 3.5.0, PopGenome 2.7.5) per chromosome, by 5kb windows (35). The  
157 top 5% scoring regions (centromeric regions excluded) were tested for enrichment using  
158 a hypergeometric test with FDR correction. Large duplications and aneuploidies were  
159 visualized using funpipe (coverage analysis) version 0.1.0  
160 (<https://github.com/broadinstitute/funpipe>).

161

### 162 **Genome-Wide Association Studies**

163 Association analysis between clinical data, in vitro phenotypes, and variants was carried  
164 out using PLINK v1.08p formatted files and Gemma version 0.94.1 (36) (options:  
165 centered relatedness matrix gk 1, linear mixed model), as previously described (11).  
166 Variants were considered in two scenarios, one in which rare variants (present in < 5%  
167 of the population) were collapsed by gene, and another in which loss-of-function  
168 variants (SNPeff impact high) were considered independently. Significant variants were  
169 considered to have a test score < 1.00E-6.

170

### 171 **Clinical Data Analysis**

172 De-identified clinical metadata detailing CSF fungal burden (CFU/ml), fungal clearance  
173 (EFA), patient mortality, and Glasgow coma score were provided by investigators, with  
174 these parameters determined as previously described (24). Correlation between clinical  
175 parameters was determined in R 3.6.0 with Pearson correlation coefficient, Spearman's  
176 rank correlation coefficient, point-biserial correlation, or Phi coefficient. Survival curves  
177 were generated using Prism v9.1.0 and statistics were carried out in R 3.6.0.

178

### 179 **In vitro Phenotyping**

180 Strains were grown at 30°C for two to five days. For each strain, a single colony was  
181 selected and added to 96 well microtiter plates containing 200  $\mu$ L of YPD broth. Each 96  
182 well plate contained six control strains (H99, *LAC1*, *MPK1*, *CNA1*, *RAS1*, and *HOG1*)



183 and a YPD control. The 96 well plates were incubated for one to two days at 30°C.  
184 Colonies were pin replicated into 384 well microtiter plates containing 80 µL of YPD  
185 broth in each well. The 384 well plates were incubated for one to two days at 30°C.  
186 They were then pinned onto one well solid agar plates in duplicate using the BM5-BC  
187 Colony Processing Robot (S & P Robotics) in 1536 array format. In three separate  
188 biological replicates, isolates were grown at 30°C, 37°C, and 39°C on YPD agar.  
189 Isolates were also pinned onto YPD+10 µg/ml fluconazole and YPD+64 µg/ml  
190 fluconazole. Images were captured after approximately 24, 48, and 72 h. Colony size at  
191 48h was determined using gitter (37), and used to assess growth.

192

### 193 **Gene Deletion Strains**

194 Strains used for the animal studies and the primer sequences used are listed in  
195 Supplemental Table 1. KN99alpha (CM026) was used as the reference wild-type strain  
196 for deletions obtained from a genome-wide *Cryptococcus* deletion library (38). Four  
197 deletion strains were generated in wild-type *C. neoformans* strain H99 (*cnag\_00544Δ*,  
198 *cnag\_04102Δ*, *cnag\_05324Δ*, *cnag\_06033Δ*) in this study. Three DNA fragments were  
199 amplified by PCR: approximately 0.7-1 kb of 5' flank sequence, the nourseothricin  
200 (NAT) drug selection cassette amplified from pAI3 (39), and 0.7-1 kb of 3' flank  
201 sequence were prepared for each gene. The PCR products were gel extracted using  
202 the NucleoSpin Gel and PCR Clean-up Kit (Macherey-Nagel). Next, the PCR products  
203 were cloned into pUC19 using NEBuilder HiFi DNA Assembly, transformed into  
204 *Escherichia coli*, and positive plasmids were confirmed by PCR. For biolistic  
205 transformation, 2 µg of plasmid was transformed into *C. neoformans* strain H99 as  
206 previously described (40) with a slight modification that the cells were recovered on  
207 YPD containing 0.5 M sorbitol and 0.5 M mannitol. The cells were allowed to recover for  
208 2.5 h before transferring to the selective medium, YPD+100 µg/ml NAT. Positive  
209 transformants were confirmed by PCR.

210

### 211 **Capsule production**

212 To evaluate the capsule size, capsule inducing medium (10% Sabouraud broth in 50  
213 mM MOPS pH 7.3) was used as previously described (41). Five milliliters of capsule

214 inducing medium was inoculated with a single freshly streaked yeast colony and grown  
215 in an incubator shaker (225 rpm) for approximately 24 and 48 h. India ink was used as a  
216 counterstain at a 1:5 ratio (ink:cell suspension). Images were captured by microscopy  
217 (Zeis Axio Imager 1). Cell body and capsule size were measured in ImageJ V1.53a.

218

### 219 **Murine model of infection**

220 *C. neoformans* strains were grown in YPD broth at 30°C in a shaking incubator (220  
221 rpm) for 24 h, centrifuged, and washed twice in phosphate-buffered saline (PBS). Cell  
222 counts were determined using a T4 cell counter (Nexcelom). Five male CD-1 mice  
223 (Charles River Laboratories) were infected with approximately  $5 \times 10^4$  yeast cells per  
224 mouse via oropharyngeal aspiration while under isoflurane anesthesia. Mice were  
225 monitored and weighed daily. Mice with a total body weight loss of  $\geq 20\%$  or that  
226 exhibited behavioral, neurological, or respiratory symptoms were sacrificed following  
227 IACUC guidelines. Kaplan-Meier survival plots and analysis (the log-rank test) were  
228 completed using Prism software v9.1.0.; GraphPad Software. A p-value of  $\leq 0.05$  was  
229 considered statistically significant.

230

### 231 **Rabbit model of infection**

232 To assess the fitness and virulence of deletion strains in rabbit CSF, 3 New Zealand  
233 White male rabbits were inoculated intracisternally with 300  $\mu$ l of approximately  $1 \times 10^8$   
234 cells. Animals were sedated with ketamine and xylazine for inoculation and serial CSF  
235 cisternal taps. The rabbits were treated with hydrocortisone acetate (2.5 mg/kg) by  
236 intramuscular injections daily starting one day prior to yeast inoculation. Cisternal taps  
237 were performed on days 3, 7, and 10 followed by serial dilution of the CSF and  
238 enumeration of colonies. The time series fungal burden data were then assessed by  
239 using repeated measures analysis in R v3.6.1.

240

### 241 **Animal studies**

242 Animal experiments were performed in compliance with the Animal Welfare Act, the  
243 *Guide for the Care and Use of Laboratory Animals* (42), and the Duke Institutional  
244 Animal Care and Use Committee (IACUC).



## 245 Results

### 246 The VNI lineage dominates clinical isolates and shows selection for sugar 247 transporters

248 To examine variation within clinical populations, *C. neoformans* samples were isolated  
249 from HIV-infected patients as part of the ACTA trial (24), which evaluated the efficacy of  
250 fluconazole partnered with flucytosine, compared to amphotericin B combined with  
251 either fluconazole or flucytosine, as induction therapy for cryptococcal meningitis.  
252 Baseline (pre-antifungal exposure) isolates were collected from three hospitals in  
253 Malawi between 2013 and 2016. We performed whole-genome sequencing on 344  
254 isolates and called variants against the *C. neoformans var grubii* H99 reference genome  
255 (27). Isolates identified as *Cryptococcus gattii* (45), hybrid AD *C. neoformans* (4), diploid  
256 (2), or with low coverage (9), based on evaluating read alignments to a pan-  
257 *Cryptococcus* collection of reference genomes, were removed from the analysis. To  
258 examine the population structure, a maximum likelihood phylogeny was built using  
259 72,258 segregating SNP sites (Figure 1). Isolates can be clearly identified as VNI (266),  
260 VNII (9), and VNB (9) based on phylogenetic comparison with previously typed isolates  
261 reported by Desjardins et al (11). VNI isolates split into VNIa (217) and VNIIb (49) with  
262 100% bootstrap support; these recently described sub-lineages show strong evidence  
263 of separation (11). Of the two mating type loci found in *Cryptococcus*, mating type  $\alpha$   
264 predominated among these isolates, with only one VNB isolate (ACTA3525-D)  
265 possessing the alternate *MATa*. To assess recombination within the large VNI  
266 population, we calculated linkage disequilibrium (LD) decay and found levels of decay  
267 for lineage VNI (LD50 30kb) (Supplemental Figure 1) similar to those reported by  
268 Desjardins et al. (LD50 for VNI, VNBI, and VNBII being < 50kb) (11). There is increased  
269 decay in the VNI population as a whole when compared to individual VNIa and VNIIb  
270 sub-groups (LD50 of 110kb for VNIIb, LD50 not reached within 250kb for VNIa),  
271 suggesting that VNIa and VNIIb isolates do not recombine exclusively within their  
272 groups.

273

274 To identify genomic regions under positive selection, we performed composite likelihood  
275 ratio analysis (43). We found that regions with scores in the top 10% in more than one

276 lineage (examining VNla, VNlb, VNII, and VNB) include subtelomeric regions,  
277 centromeres, *ERG11*, and *AFR1* (Supplemental Figure 2). To examine if genes within  
278 these regions are associated with shared functions that appear under selection, we  
279 performed gene ontology (GO) enrichment analysis (Hypergeometric test, FDR  
280 correction) on regions with selection scores in the top 5% (excluding centromeres). For  
281 VNII isolates we found nucleotide excision repair enriched in these regions (corrected p-  
282 value = 6.77E-3). Sugar transport, including inositol transport, appeared robustly  
283 enriched in both VNla and VNB lineages (corrected p-value's = 1.07E-3 and 8.60E-3),  
284 supporting previous work that identified these functions as under selection  
285 (Supplemental Table 2) (11). Sugar transport and utilization have been identified as key  
286 to success in nutrient scarce environments such as the CNS (23, 44, 45), during  
287 interactions with amoebae, and are required for virulence and resistance to external  
288 stress (46–49).

289  
290 We also identified regions that were duplicated or deleted in these *C. neoformans*  
291 isolates via copy number variation analysis (Supplemental Table 3). An 8kb region was  
292 found to be duplicated in 43 VNla isolates, containing 4 genes including a sugar  
293 transporter (TCDB: 2.A.1.1, glycerol transport), a predicted non-coding RNA, a fungal  
294 specific transcription factor (Zn2Cys6, *SIP402*), and a short-chain dehydrogenase. A  
295 separate 34kb region was found duplicated across 48 VNla isolates encoding 11 genes  
296 including 3 dehydrogenase enzymes and 2 hydrolase enzymes. Duplicated regions  
297 unique to VNlb included an un-annotated 19kb region specific to 20 isolates and an 8kb  
298 region that encodes 2 hypothetical proteins duplicated across 21 VNlb isolates.  
299 Duplications of genes involved in resistance to azoles such as *ERG11* were found  
300 exclusively in VNII isolates, however, this did not correlate with an enhanced ability to  
301 grow in the presence of fluconazole at 64ug/ml. While these duplicated regions are not  
302 directly associated with tested phenotypes, the duplication of regions containing genes  
303 such as *ERG11* and sugar transporters may still contribute to phenotypic variation that  
304 is relevant to clinical outcomes through modulation of growth and virulence phenotypes  
305 when grown in alternate conditions.

306

## 307 **GWAS identifies multiple variants associated with fungal burden**

308 We next used clinical data associated with these isolates to investigate the relationship  
309 between clinical factors, across lineages. We confirmed previous findings that mortality  
310 correlates strongly with high baseline fungal burden (CSF CFU/ml taken at diagnosis of  
311 cryptococcal meningitis) (Figure 2a,  $p=7.70E-7$ ) as shown in prior studies (50–52), and  
312 observed similar outcome ratios across lineages (log-rank test,  $p=0.916$ ) (Figure 2b-c),  
313 suggesting no major lineage-specific differences in virulence, though low numbers of  
314 VNB and VNII infecting isolates may limit our power to detect significant differences  
315 here. Additionally, we noted similar levels of baseline fungal burden and rates of  
316 clearance between VNIa and VNIb infecting isolates (Figure 2d-e). The data suggest a  
317 reduction in baseline fungal burden of  $1.29E+06$  CSF CFU/ml on average for VNII when  
318 compared to VNI isolates (Wilcoxon test,  $p=0.024$ ), however, due to the limited number  
319 of VNII isolates included, this finding should be confirmed with additional cases.

320  
321 To determine whether the variation in baseline fungal burden, which appears well  
322 distributed throughout this population (Figure 1), is linked to a specific genetic  
323 component, we performed genome-wide association studies (GWAS) to identify variants  
324 associated with higher fungal load, when taken as a continuous phenotype. We  
325 selected VNI isolates for this analysis as they represent the major genetic group  
326 present, and to avoid confounding factors of population structure between lineages.  
327 This analysis revealed 53 variants that were significantly (GEMMA score test,  $p <$   
328  $1.00E-6$ ) associated with CSF fungal burden levels (Figure 3a), 16 of which were  
329 predicted to result in a loss-of-function mutation. These variants impacted genes  
330 encoding 15 hypothetical proteins and 6 ncRNAs; an additional 4 variants fell into non-  
331 coding centromeric regions (Supplemental Table 4). Of the annotated genes impacted,  
332 4 have been previously identified to modulate virulence phenotypes, these include the  
333 protein S-acyl transferase *PFA4* (CNAG\_03981), the calcineurin catalytic subunit *CNA1*  
334 (CNAG\_04796), and the mitochondrial co-chaperone *MRJ1* (CNAG\_00938) that are  
335 required for virulence in the murine model, as well as the iron permease *FTR1*  
336 (CNAG\_06242) that is required for capsule regulation (53–56). Additionally, 2 genes  
337 with variants are known to impact titan cell formation, these include the multidrug

338 transporter CNAG\_04546 and the adenylate cyclase *CAC1* (CNAG\_03202) (57, 58). A  
339 high proportion (28%) of variants with high GWAS scores (GEMMA score test,  $p <$   
340  $1.00E-6$ ) appeared in genes annotated as hypothetical proteins. For phenotype  
341 characterization, we decided to focus on genes impacted by variants associated with  
342 higher fungal burden, that were predicted to result in a loss-of-function within coding  
343 regions.

344

### 345 **Two hypothetical proteins impact virulence in a murine model**

346 To determine if the genes identified through our GWAS analysis of fungal burden impact  
347 virulence, we tested a total of 10 gene deletion strains across murine and rabbit models.  
348 Previous work has shown that infection outcomes from human infections are well  
349 recapitulated in murine models (8), while rabbit models have proven useful in evaluating  
350 CNS infections, as fungal burden within the CNS can be determined through  
351 longitudinal tapping of CSF (59). The most striking result from GWAS analysis was a  
352 pileup of 5 variants in the hypothetical protein CNAG\_04102, with the highest scoring  
353 variant within this gene being the third most significant overall (GEMMA score test,  
354  $p=1.30E-11$ ). Deletion of CNAG\_04102 in a H99 background led to reduced virulence in  
355 a murine model (5 male CD-1 mice), compared to a H99 isolate control (log-rank test,  
356  $p=0.0427$ ) (Figure 3b). This gene contains a Kyakuja-Dileera-Zisupton (KDZ)  
357 superfamily motif (pfam18758), which has been found within species from  
358 basidiomycota, mucoromycotina, *rhizophagus* and *allomyces* (60), with CNAG\_04102  
359 homologs containing this motif found in *Cryptococcus gattii* and *Cryptococcus floricola*.  
360 The KDZ motif is also commonly located within TET/JBP genes which are involved in  
361 genomic organization and epigenetic regulation (61), suggesting a role for gene  
362 expression regulation. Deletion of a second hypothetical protein, CNAG\_05608, (in a  
363 CMO26 KN99 background) also resulted in reduced virulence within a murine model (5  
364 male CD-1 mice), with isolates lacking a functional CNAG\_05608 exhibiting reduced  
365 virulence, when compared to wild type (log-rank test,  $p=0.0154$ ) (Figure 3c). While  
366 CNAG\_05608 is annotated as a hypothetical protein, this gene is predicted to contain a  
367 single transmembrane domain and has homologs in *Cryptococcus gattii*, *Cryptococcus*  
368 *amylolentus*, *Kwoniella* species, and *Wallemia* species. Furthermore, this gene is

369 upregulated during growth in both murine and monkey lungs (62), and slightly  
370 downregulated when grown in the presence of glucose (63), suggesting a role during  
371 infection.

372

### 373 **Sugar transport and metabolism impacts persistence in a rabbit CNS infection** 374 **model**

375 When loss-of-function variants were considered independently, the most highly  
376 significant variant was a frameshift in the phosphofructokinase gene, CNAG\_06033  
377 (pfkB) (GEMMA score test,  $p=1.69E-09$ ). Deletion of CNAG\_06033 in a H99  
378 background resulted in significantly decreased CSF burden within the rabbit model (3  
379 New Zealand white male rabbits) when compared to a H99 isolate, with CSF CFU/ml  
380 counts dependent on both the infecting strain and the number of days post-infection.  
381 The CSF loads were comparable across three rabbits for H99 and the CNAG\_06033  
382 deletion at 3 days post-infection, but decreased for the CNAG\_06033 deletion at days 7  
383 and 10, in contrast to the H99 isolate which showed increased CSF load over time  
384 (repeated measures analysis,  $p=0.0225$ ) (Figure 3d), highlighting the need for efficient  
385 glycolysis within the mammalian CSF (44). The overall virulence within a murine model  
386 (5 male CD-1 mice) for the CNAG\_06033 deletion strain appeared similar to wild type  
387 (log-rank test,  $p=0.1198$ ) (Figure 3e), demonstrating that defects in glycolytic  
388 metabolism do not appear to restrict persistence and dissemination but critically may be  
389 important at specific body sites. Loss-of-function variants within this gene have been  
390 shown to emerge over the course of in vivo passage in CSF during human infection and  
391 relapse (15), suggesting a role for the loss of CNAG\_06033 in adaptation to the host at  
392 specific body sites. This result is consistent with prior work that tested deletions of other  
393 genes involved in glycolysis; loss of pyruvate kinase (*pyk1Δ*) resulted in decreased  
394 persistence in the rabbit CSF, but unperturbed dissemination in a murine model (44).  
395 Further supporting the role of glycolysis and sugar transport in the survival of *C.*  
396 *neoformans* in CSF, we identified significant variants in additional genes involved in  
397 these pathways. A predicted xylose transporter, CNAG\_05324, contained a frameshift  
398 variant present in 33 isolates (GEMMA score test,  $p=4.00E-07$ ). In preliminary  
399 experiments deletion of CNAG\_05324 in a H99 background led to an increase in CSF

400 load in one rabbit when compared to its H99 control. However, additional experiments  
401 are required to confirm these results (Supplemental Figure 3a). Given the predicted role  
402 of this gene as a xylose transporter, and the presence of xylose in cryptococcal capsule,  
403 we undertook preliminary phenotypic capsule screening of the CNAG\_05324 deletion  
404 strain. Capsule analysis of this deletion mutant via cultivation in capsule-inducing media  
405 and India ink staining revealed a significant increase in capsule thickness (Welch's T-  
406 test,  $p=3.9E-14$ ) (Supplemental Figure 3b), suggesting a role for CNAG\_05324 in  
407 capsule size modulation. Previous work has shown that modulation of xylose transport  
408 and xylosylation can drastically alter virulence, capsule size, and immune evasion (64,  
409 65), highlighting this capsular mechanism as an area for further exploration.

410

### 411 **Aneuploidy is common and slows growth**

412 To determine how natural variation might affect growth and other clinically relevant  
413 phenotypes, we performed in vitro phenotyping of isolates. Isolates displayed a range of  
414 growth levels on rich media (YPD) at 30°C, 37°C, and 39°C (Figure 4a-c), with colony  
415 size across conditions and replicates showing strong correlation (Figure 4d,e, replicate  
416 per condition  $R^2 > 0.8$ ). To determine whether this variation is linked to a specific  
417 genetic component, we performed GWAS to identify variants associated with increased  
418 and decreased colony size. Significantly associated with the rapid growth of large  
419 colonies on YPD were loss-of-function variants in CNAG\_06637 (UBP8 Ubiquitin-  
420 specific protease, component of the SAGA complex), CNAG\_03818 (sensory  
421 transduction histidine kinase), and CNAG\_10082 (tRNA Threonine) (GEMMA score  
422 test,  $p < 1.00E-6$ ). A single loss-of-function variant was found significantly associated  
423 with decreased colony size, a frameshift in the dolichyldiphosphatase encoding gene,  
424 CNAG\_03014 (GEMMA score test,  $p=9.90E-12$ ). Naturally occurring loss-of-function  
425 variants such as these may play a role in the fitness variation we see between clinical  
426 isolates.

427

428 In addition to SNP and indel mutations, we evaluated the level of chromosome copy  
429 number variation across these clinical isolates. We observed both fully and partially  
430 duplicated chromosomes, with the most commonly duplicated chromosomes being 12,



431 9, 14, and 1; overall, duplication of an entire chromosome occurs in 8.5% of clinical  
432 isolates. Partial duplications, where at least 25% of the chromosome shows continuous  
433 duplication, occur most frequently in chromosomes 2 and 6 (15 instances, Figure 5a).  
434 Aneuploid isolates appear well distributed throughout this clinical dataset (Supplemental  
435 Figure 4a), suggesting frequent and independent origins for these events occurring in  
436 vivo.

437  
438 To evaluate the impact of these large aneuploidies, we next compared the growth of  
439 aneuploid and euploid isolates. On rich media (YPD), at 30°C, 37°C, and 39°C, isolates  
440 harboring a fully duplicated chromosome showed significantly poorer growth than  
441 euploid isolates (Wilcoxon test,  $p < 5.00E-07$ ), or isolates featuring only a partial  
442 chromosomal duplication (Wilcoxon test,  $p < 0.01$ ) (Figure 5b-d). To determine whether  
443 this fitness reduction occurs in both clinical and environmental populations, we carried  
444 out a metaanalysis of the data for these isolates, and data previously generated using the  
445 same assay for a diverse set of clinical and environmental isolates (Supplemental  
446 Figure 4b) (11). Isolates with aneuploidies present in both datasets displayed a  
447 significant reduction in growth on YPD at 37°C ( $p=2.00E-07$ ), demonstrating that this  
448 reduction in fitness holds true for both clinical and environmental isolates, across  
449 lineages VNI and VNB.

450  
451 Aneuploidy can be advantageous under certain stressors such as antifungal treatment,  
452 however, with optimal nutrients at a range of temperatures we found that aneuploidy  
453 significantly reduces fitness. Modulation of chromosome 1 ploidy has been linked to  
454 apoptosis-inducing factor 1 (*AIF1*) (13), however, variants within *AIF1* were not present  
455 in this population, suggesting an alternate mechanism may be responsible for  
456 modulation of chromosome copy number here.

## 457 **Discussion**

458 Phylogenetic analysis of 284 *C. neoformans* samples from patients with cryptococcosis  
459 revealed a mixed population of VNI, VNB, and VNII isolates, dominated by the VNI  
460 lineage. We leverage clinical metadata to identify multiple variants associated with  
461 fungal burden, a factor known to impact patient mortality, in combination with additional

462 factors such as host immune response, host genetic background, and antifungal  
463 treatment. We identify both SNPs and indels significantly associated with fungal burden,  
464 but not with other clinical factors such as mortality and rate of yeast clearance. We  
465 utilize these association results to identify three genes involved in virulence. Of these,  
466 two are annotated as hypothetical proteins and when deleted show reduced virulence in  
467 a murine model, and one encodes for a phosphofructokinase that when deleted shows  
468 reduced persistence in a rabbit CNS model. We employ in vitro phenotyping to identify  
469 multiple variants associated with both poor and prolific growth phenotypes, and through  
470 copy number analysis, we reveal multiple and varied aneuploidies within this clinical  
471 population, as well as a previously reported environmental population. These  
472 aneuploidies appear to reduce fitness levels in isolates from both clinical and  
473 environmental sources, across both VNI and VNB lineages.

474

475 Isolates collected from patients in Malawi as part of the ACTA study were dominated by  
476 the VNI genetic group, the most commonly observed global lineage of *C. neoformans*.  
477 This population consists of two of the three previously identified VNI lineages (VNIa,  
478 and VNIb) (66, 67). VNI isolates are found around the globe and appear relatively clonal  
479 when compared to the highly diverse VNB lineage, often isolated from rural niches,  
480 such as mopane trees, in Africa and South America (11, 68–70).

481

482 Sugar transporters have previously been identified as under selection in both VNI and  
483 VNB isolates from Botswana (11), and we find they also appear under selection in both  
484 VNI and VNB isolates in this population from Malawi. Specifically, we find inositol,  
485 xylose, glucose, lactose, and glucoside transporters under selection. The expansion of  
486 inositol transporters in *C. neoformans* may offer an advantage in both woodland areas  
487 and the CNS, as these environments have abundant inositol (46). Xylose transport is  
488 important for *C. neoformans* capsule production, the variable xylosylation of which can  
489 enable immune evasion (65). The signaling molecule and preferred carbon source  
490 glucose, the precursor of glucoside, is known to regulate hexose transporters that are  
491 required for virulence (47) and is a key glycolytic metabolite, a pathway required for  
492 growth in the CNS (44).

493

494 We identified multiple variants significantly associated with clinical and growth  
495 phenotypes by taking a GWAS approach, however, clinical phenotypes such as  
496 mortality and mental-status did not show a strong association with any variants  
497 identified, perhaps due to the complex nature of these characteristics. Additionally, we  
498 used a culture-based method to select for isolates from patients, and culture-negative  
499 individuals were excluded. As a result, we were unable to detect variants associated  
500 with very low levels of fungal burden in the CNS. While extensively applied to human  
501 data, genome-wide association studies have also been applied to study fungal human  
502 pathogens (9–11) and plant-pathogens (71, 72). A major challenge is adapting these  
503 association approaches for the population structure of each species; for *C. neoformans*,  
504 while there is recombination within the population, LD50 values for VNI, VNBI, and  
505 VNBII populations are < 50kb (11). Expanding the sample size for such associations or  
506 focusing narrowly on particular genetic groups can help increase the power to detect  
507 variants, however, the choice of GWAS approach also needs to be optimized for the  
508 population under study through consideration of population structure and size.

509

510 Through analysis of the clinical metadata, we found CSF fungal burden, a measure of  
511 the quantity of live yeasts at the site of infection, to be the strongest factor in carrying  
512 out GWAS. We found that high fungal burden within the CSF of an individual strongly  
513 correlated with patient mortality, in accordance with prior work showing that high fungal  
514 load is a predictor of mortality (50–52). We found that isolates lacking a functional  
515 phosphofructokinase B (CNAG\_06033) exhibited a reduced CSF load within a rabbit  
516 model; phosphofructokinase plays a key regulatory role in the glycolytic pathway.  
517 Patient isolates containing naturally occurring loss-of-function variants in CNAG\_06033  
518 showed no growth defects when grown on YPD at 37°C, and our phosphofructokinase  
519 mutant showed a CSF load reduction similar to that observed for the pyruvate kinase  
520 (*PYK1*) deletion strain within a rabbit model, likely due to the similar regulatory effects of  
521 both enzymes in glycolysis (44). Additionally, loss-of-function variants have previously  
522 been identified in CNAG\_06033 (PfkB) after in vivo human passage (15). Under stress  
523 conditions, metabolically heterogeneous populations may emerge (73, 74), this

524 metabolic diversity might explain the emergence of isolates less reliant upon glycolysis  
525 through growth within the host. Additionally, we identified two hypothetical proteins that  
526 appear to play a role in virulence within the murine model; this highlights the power of  
527 our unbiased GWAS approach to systematically identify gene candidates implicated in  
528 virulence, in the absence of additional functional or pathway information. Other  
529 systematic studies utilizing RNA-Seq have also identified genes encoding hypothetical  
530 proteins that are strong candidates for further study, due to their high expression in CSF  
531 (23, 45). While the large proportion of *C. neoformans* genes annotated as hypothetical  
532 proteins are more challenging to study, it is critical that we more widely characterize the  
533 roles of all genes involved in the pathogenesis of *C. neoformans*.

534  
535 We also found evidence that ploidy directly impacts the fitness of both clinical and  
536 environmental *C. neoformans* isolates. Aneuploidy has been linked to broad-spectrum  
537 stress resistance in *Candida* species (75), and in *C. neoformans*, disomy of  
538 chromosome 1 is known to arise in isolates treated with azoles both in vitro and in vivo  
539 and confers resistance to azoles such as fluconazole, through the increase in copy  
540 number of *AFR1* and *ERG11* (12, 14). Suggested mechanisms for modulation of  
541 chromosome 1 ploidy include regulation via the apoptosis-inducing factor Aif1 (13),  
542 however, we did not find evidence for Aif1 disruption in these isolates. Specific impacts  
543 of disomy have also been noted for chromosome 13, disomy of which results in reduced  
544 melanization (20). In *S. cerevisiae*, disomy of select chromosomes also results in  
545 reduced proliferation rates (76). Whilst the reduction in fitness we observed does not  
546 seem specific to any particular chromosome, the questions of how and why ploidy  
547 appears subject to change in stressful conditions and whether the most frequently  
548 observed aneuploidies confer a specific advantage are intriguing and will require further  
549 study.

550  
551 By combining genetic, in vitro, and clinical data, we glean insights into the impact of  
552 naturally-occurring genetic variation and the implications for infection outcomes. As  
553 whole genome sequencing on an ever-larger scale becomes more accessible, and  
554 association techniques for microbial communities grow in sophistication, so too will our

555 power to detect functionally relevant genetic variation across cryptococcal populations.  
556 Combined with data from large pan-African clinical trials, and approaches that leverage  
557 both fungal and human variant identification, we can further dissect the interaction  
558 between pathogen and host genetics. Together, this will enable a better understanding  
559 of how these variations impact the ability of *Cryptococcus* to adapt to, and thrive in, the  
560 wide range of environments it finds itself within.

## 561 **References**

- 562 1. Rajasingham R, Smith RM, Park BJ, Jarvis JN, Govender NP, Chiller TM, Denning  
563 DW, Loyse A, Boulware DR. 2017. Global burden of disease of HIV-associated  
564 cryptococcal meningitis: an updated analysis. *Lancet Infect Dis* 17:873–881.
- 565 2. Maziarz EK, Perfect JR. 2016. Cryptococcosis. *Infect Dis Clin North Am* 30:179–  
566 206.
- 567 3. Chayakulkeeree M, Perfect JR. 2006. Cryptococcosis. *Infect Dis Clin North Am*  
568 20:507–544, v–vi.
- 569 4. Litvintseva AP, Thakur R, Vilgalys R, Mitchell TG. 2006. Multilocus sequence  
570 typing reveals three genetic subpopulations of *Cryptococcus neoformans* var.  
571 *grubii* (serotype A), including a unique population in Botswana. *Genetics*  
572 172:2223–2238.
- 573 5. Chen Y, Litvintseva AP, Frazzitta AE, Haverkamp MR, Wang L, Fang C, Muthoga  
574 C, Mitchell TG, Perfect JR. 2015. Comparative analyses of clinical and  
575 environmental populations of *Cryptococcus neoformans* in Botswana. *Mol Ecol*  
576 24:3559–3571.
- 577 6. Nyazika TK, Hagen F, Machiridza T, Kutepa M, Masanganise F, Hendrickx M,  
578 Boekhout T, Magombe-Majinjiwa T, Siziba N, Chin'ombe N, Mateveke K, Meis JF,  
579 Robertson VJ. 2016. *Cryptococcus neoformans* population diversity and clinical  
580 outcomes of HIV-associated cryptococcal meningitis patients in Zimbabwe. *J Med*  
581 *Microbiol* 65:1281–1288.

- 582 7. Fernandes KE, Brockway A, Haverkamp M, Cuomo CA, van Ogtrop F, Perfect JR,  
583 Carter DA. 2018. Phenotypic variability correlates with clinical outcome in  
584 *Cryptococcus* isolates obtained from Botswanan HIV/AIDS patients. *mBio*  
585 9(5):e02016-18.
- 586 8. Mukaremera L, McDonald TR, Nielsen JN, Molenaar CJ, Akampurira A, Schutz C,  
587 Taseera K, Muzoora C, Meintjes G, Meyya DB, Boulware DR, Nielsen K. 2019. The  
588 mouse inhalation model of *Cryptococcus neoformans* infection recapitulates strain  
589 virulence in humans and shows that closely related strains can possess differential  
590 virulence. *Infection and Immunity* 87(5):e00046-19.
- 591 9. Gerstein AC, Jackson KM, McDonald TR, Wang Y, Lueck BD, Bohjanen S, Smith  
592 KD, Akampurira A, Meyya DB, Xue C, Boulware DR, Nielsen K. 2019. Identification  
593 of pathogen genomic differences that impact human immune response and  
594 disease during *Cryptococcus neoformans* infection. *mBio* 10(4):e01440-19.
- 595 10. Beale MA, Sabiiti W, Robertson EJ, Fuentes-Cabrejo KM, O'Hanlon SJ, Jarvis JN,  
596 Loyse A, Meintjes G, Harrison TS, May RC, Fisher MC, Bicanic T. 2015. Genotypic  
597 diversity is associated with clinical outcome and phenotype in Cryptococcal  
598 meningitis across southern Africa. *PLOS Neglected Tropical Diseases*  
599 9(6):e0003847.
- 600 11. Desjardins CA, Giamberardino C, Sykes SM, Yu C-H, Tenor JL, Chen Y, Yang T,  
601 Jones AM, Sun S, Haverkamp MR, Heitman J, Litvintseva AP, Perfect JR, Cuomo  
602 CA. 2017. Population genomics and the evolution of virulence in the fungal  
603 pathogen *Cryptococcus neoformans*. *Genome Research* 27:1207–1219.
- 604 12. Sionov E, Lee H, Chang YC, Kwon-Chung KJ. 2010. *Cryptococcus neoformans*  
605 overcomes stress of azole drugs by formation of disomy in specific multiple  
606 chromosomes. *PLOS Pathogens* 6(4):e1000848.
- 607 13. Semighini CP, Averette AF, Perfect JR, Heitman J. 2011. Deletion of *Cryptococcus*  
608 *neoformans* AIF ortholog promotes chromosome aneuploidy and fluconazole-



- 609 resistance in a metacaspase-independent manner. PLOS Pathogens  
610 7(11):e1002364.
- 611 14. Stone NRH, Rhodes J, Fisher MC, Mfinanga S, Kivuyo S, Rugemalila J, Segal ES,  
612 Needleman L, Molloy SF, Kwon-Chung J, Harrison TS, Hope W, Berman J, Bicanic  
613 T. 2019. Dynamic ploidy changes drive fluconazole resistance in human  
614 cryptococcal meningitis. J Clin Invest 129:999–1014.
- 615 15. Chen Y, Farrer RA, Giamberardino C, Sakthikumar S, Jones A, Yang T, Tenor JL,  
616 Wagih O, Van Wyk M, Govender NP, Mitchell TG, Litvintseva AP, Cuomo CA,  
617 Perfect JR. 2017. Microevolution of serial clinical isolates of *Cryptococcus*  
618 *neoformans* var. *grubii* and *C. gattii*. mBio 8(2):e00166-17.
- 619 16. Rhodes J, Beale MA, Vanhove M, Jarvis JN, Kannambath S, Simpson JA, Ryan A,  
620 Meintjes G, Harrison TS, Fisher MC, Bicanic T. 2017. A population genomics  
621 approach to assessing the genetic basis of within-host microevolution underlying  
622 recurrent cryptococcal meningitis infection. G3: Genes, Genomes, Genetics  
623 7:1165–1176.
- 624 17. Fu MS, Liporagi-Lopes LC, Dos SR, Júnior S, Tenor JL, Perfect JR, Cuomo CA,  
625 Casadevall A. 2021. Amoeba predation of *Cryptococcus neoformans* results in  
626 pleiotropic changes to traits associated with virulence. mBio 12(2):e00567-21.
- 627 18. Gerstein AC, Fu MS, Mukaremera L, Li Z, Ormerod KL, Fraser JA, Berman J,  
628 Nielsen K. 2015. Polyploid titan cells produce haploid and aneuploid progeny to  
629 promote stress adaptation. mBio 6(5):e01340-15.
- 630 19. Berman J. 2016. Ploidy plasticity: a rapid and reversible strategy for adaptation to  
631 stress. FEMS Yeast Research 16(3):fow020.
- 632 20. Hu G, Wang J, Choi J, Jung WH, Liu I, Litvintseva AP, Bicanic T, Aurora R, Mitchell  
633 TG, Perfect JR, Kronstad JW. 2011. Variation in chromosome copy number  
634 influences the virulence of *Cryptococcus neoformans* and occurs in isolates from  
635 AIDS patients. BMC Genomics 12:526.

- 636 21. Ormerod KL, Morrow CA, Chow EWL, Lee IR, Arras SDM, Schirra HJ, Cox GM,  
637 Fries BC, Fraser JA. 2013. Comparative genomics of serial isolates of  
638 *Cryptococcus neoformans* reveals gene associated with carbon utilization and  
639 virulence. *G3: Genes, Genomes, Genetics* 3:675–686.
- 640 22. Rhodes J, Desjardins CA, Sykes SM, Beale MA, Vanhove M, Sakthikumar S, Chen  
641 Y, Gujja S, Saif S, Chowdhary A, Lawson DJ, Ponzio V, Colombo AL, Meyer W,  
642 Engelthaler DM, Hagen F, Illnait-Zaragozi MT, Alanio A, Vreulink JM, Heitman J,  
643 Perfect JR, Litvintseva AP, Bicanic T, Harrison TS, Fisher MC, Cuomo CA. 2017.  
644 Tracing genetic exchange and biogeography of *Cryptococcus neoformans* var.  
645 *grubii* at the global population level. *Genetics* 207:327–346.
- 646 23. Yu C-H, Sephton-Clark P, Tenor JL, Toffaletti D, Giamberardino C, Haverkamp M,  
647 Cuomo C, Perfect J. 2021. Gene expression of diverse *Cryptococcus* isolates  
648 during infection of the human central nervous system. *mBio* 12(6):e0231321.
- 649 24. Molloy SF, Kanyama C, Heyderman RS, Loyse A, Kouanfack C, Chanda D,  
650 Mfinanga S, Temfack E, Lakhi S, Lesikari S, Chan AK, Stone N, Kalata N,  
651 Karunaharan N, Gaskell K, Peirse M, Ellis J, Chawinga C, Lontsi S, Ndong J-G,  
652 Bright P, Lupiya D, Chen T, Bradley J, Adams J, van der Horst C, van Oosterhout  
653 JJ, Sini V, Mapoure YN, Mwaba P, Bicanic T, Lalloo DG, Wang D, Hosseinipour  
654 MC, Lortholary O, Jaffar S, Harrison TS, ACTA Trial Study Team. 2018. Antifungal  
655 combinations for treatment of cryptococcal meningitis in Africa. *N Engl J Med*  
656 378:1004–1017.
- 657 25. Fisher S, Barry A, Abreu J, Minie B, Nolan J, Delorey TM, Young G, Fennell TJ,  
658 Allen A, Ambrogio L, Berlin AM, Blumenstiel B, Cibulskis K, Friedrich D, Johnson  
659 R, Juhn F, Reilly B, Shammass R, Stalker J, Sykes SM, Thompson J, Walsh J,  
660 Zimmer A, Zwirko Z, Gabriel S, Nicol R, Nusbaum C. 2011. A scalable, fully  
661 automated process for construction of sequence-ready human exome targeted  
662 capture libraries. *Genome Biology* 12(1):R1.

- 663 26. Loftus BJ, Fung E, Roncaglia P, Rowley D, Amedeo P, Bruno D, Vamathevan J,  
664 Miranda M, Anderson IJ, Fraser JA, Allen JE, Bosdet IE, Brent MR, Chiu R,  
665 Doering TL, Donlin MJ, D'Souza CA, Fox DS, Grinberg V, Fu J, Fukushima M,  
666 Haas BJ, Huang JC, Janbon G, Jones SJM, Koo HL, Krzywinski MI, Kwon-Chung  
667 JK, Lengeler KB, Maiti R, Marra MA, Marra RE, Mathewson CA, Mitchell TG,  
668 Pertea M, Riggs FR, Salzberg SL, Schein JE, Shvartsbeyn A, Shin H, Shumway M,  
669 Specht CA, Suh BB, Tenney A, Utterback TR, Wickes BL, Wortman JR, Wye NH,  
670 Kronstad JW, Lodge JK, Heitman J, Davis RW, Fraser CM, Hyman RW. 2005. The  
671 genome of the basidiomycetous yeast and human pathogen *Cryptococcus*  
672 *neoformans*. *Science* 307:1321–1324.
- 673 27. Janbon G, Ormerod KL, Paulet D, Byrnes EJ, Yadav V, Chatterjee G, Mullapudi N,  
674 Hon CC, Billmyre RB, Brunel F, Bahn YS, Chen W, Chen Y, Chow EWL, Coppée  
675 JY, Floyd-Averette A, Gaillardin C, Gerik KJ, Goldberg J, Gonzalez-Hilarion S,  
676 Gujja S, Hamlin JL, Hsueh YP, Ianiri G, Jones S, Kodira CD, Kozubowski L, Lam  
677 W, Marra M, Mesner LD, Mieczkowski PA, Moyrand F, Nielsen K, Proux C,  
678 Rossignol T, Schein JE, Sun S, Wollschlaeger C, Wood IA, Zeng Q, Neuvéglise C,  
679 Newlon CS, Perfect JR, Lodge JK, Idnurm A, Stajich JE, Kronstad JW, Sanyal K,  
680 Heitman J, Fraser JA, Cuomo CA, Dietrich FS. 2014. Analysis of the Genome and  
681 Transcriptome of *Cryptococcus neoformans* var. *grubii* reveals complex RNA  
682 expression and microevolution leading to virulence attenuation. *PLoS Genetics*  
683 10(4):e1004261.
- 684 28. Farrer RA, Desjardins CA, Sakthikumar S, Gujja S, Saif S, Zeng Q, Chen Y, Voelz  
685 K, Heitman J, May RC, Fisher MC, Cuomo CA. 2015. Genome evolution and  
686 innovation across the four major lineages of *Cryptococcus gattii*. *mBio*  
687 6(5):e00868-15.
- 688 29. Farrer RA, Chang M, Davis MJ, van Dorp L, Yang DH, Shea T, Sewell TR, Meyer  
689 W, Balloux F, Edwards HM, Chanda D, Kwenda G, Vanhove M, Chang YC, Cuomo  
690 CA, Fisher MC, Kwon-Chung KJ. 2019. A new lineage of *Cryptococcus gattii* (VGV)  
691 discovered in the central zambesian miombo woodlands. *mBio* 10(6):e02306-19.

- 692 30. Li H. 2013. Aligning sequence reads, clone sequences and assembly contigs with  
693 BWA-MEM. arXiv:13033997 [q-bio].
- 694 31. Van der Auwera GA, Carneiro MO, Hartl C, Poplin R, Del Angel G, Levy-  
695 Moonshine A, Jordan T, Shakir K, Roazen D, Thibault J, Banks E, Garimella KV,  
696 Altshuler D, Gabriel S, DePristo MA. 2013. From FastQ data to high confidence  
697 variant calls: the Genome Analysis Toolkit best practices pipeline. *Curr Protoc*  
698 *Bioinformatics* 43:11.10.1-11.10.33.
- 699 32. Cingolani P, Platts A, Wang LL, Coon M, Nguyen T, Wang L, Land SJ, Lu X,  
700 Ruden DM. 2012. A program for annotating and predicting the effects of single  
701 nucleotide polymorphisms, SnpEff: SNPs in the genome of *Drosophila*  
702 *melanogaster* strain w<sup>1118</sup>; iso-2; iso-3. *Fly* 6:80–92.
- 703 33. Stamatakis A. 2014. RAxML version 8: a tool for phylogenetic analysis and post-  
704 analysis of large phylogenies. *Bioinformatics* 30:1312–1313.
- 705 34. Abyzov A, Urban AE, Snyder M, Gerstein M. 2011. CNVnator: An approach to  
706 discover, genotype, and characterize typical and atypical CNVs from family and  
707 population genome sequencing. *Genome Res* 21:974–984.
- 708 35. Pfeifer B, Wittelsbürger U, Ramos-Onsins SE, Lercher MJ. 2014. PopGenome: an  
709 efficient Swiss army knife for population genomic analyses in R. *Mol Biol Evol*  
710 31:1929–1936.
- 711 36. Zhou X, Stephens M. 2012. Genome-wide efficient mixed-model analysis for  
712 association studies. *Nature Genetics* 44:821–824.
- 713 37. Wagih O, Parts L. 2014. gitter: A robust and accurate method for quantification of  
714 colony sizes from plate images. *G3 (Bethesda)* 4:547–552.
- 715 38. Chun CD, Madhani HD. 2010. Applying genetics and molecular biology to the study  
716 of the human pathogen *Cryptococcus neoformans*. *Methods Enzymol* 470:797–  
717 831.

- 718 39. Idnurm A, Reedy JL, Nussbaum JC, Heitman J. 2004. *Cryptococcus neoformans*  
719 virulence gene discovery through insertional mutagenesis. *Eukaryot Cell* 3:420–  
720 429.
- 721 40. Toffaletti DL, Rude TH, Johnston SA, Durack DT, Perfect JR. 1993. Gene transfer  
722 in *Cryptococcus neoformans* by use of biolistic delivery of DNA. *J Bacteriol*  
723 175:1405–1411.
- 724 41. Zaragoza O, Casadevall A. 2004. Experimental modulation of capsule size in  
725 *Cryptococcus neoformans*. *Biol Proced Online* 6:10–15.
- 726 42. National Research Council (US) Committee for the Update of the Guide for the  
727 Care and Use of Laboratory Animals. 2011. *Guide for the Care and Use of*  
728 *Laboratory Animals*, 8th ed. National Academies Press (US), Washington (DC).
- 729 43. Nielsen R, Williamson S, Kim Y, Hubisz MJ, Clark AG, Bustamante C. 2005.  
730 Genomic scans for selective sweeps using SNP data. *Genome Res* 15:1566–1575.
- 731 44. Price MS, Betancourt-Quiroz M, Price JL, Toffaletti DL, Vora H, Hu G, Kronstad  
732 JW, Perfect JR. 2011. *Cryptococcus neoformans* requires a functional glycolytic  
733 pathway for disease but not persistence in the host. *mBio* 2(3):e00103-e111.
- 734 45. Chen Y, Toffaletti DL, Tenor JL, Litvintseva AP, Fang C, Mitchell TG, McDonald  
735 TR, Nielsen K, Boulware DR, Bicanic T, Perfect JR. 2014. The *Cryptococcus*  
736 *neoformans* transcriptome at the site of human meningitis. *mBio* 5(1):e01087-13.
- 737 46. Xue C, Liu T, Chen L, Li W, Liu I, Kronstad JW, Seyfang A, Heitman J. 2010. Role  
738 of an expanded inositol transporter repertoire in *Cryptococcus neoformans* sexual  
739 reproduction and virulence. *mBio* 1(1):e00084-10.
- 740 47. Liu T-B, Wang Y, Baker GM, Fahmy H, Jiang L, Xue C. 2013. The glucose sensor-  
741 like protein Hxs1 is a high-affinity glucose transporter and required for virulence in  
742 *Cryptococcus neoformans*. *PLOS ONE* 8(5):e64239.

- 743 48. Li LX, Rautengarten C, Heazlewood JL, Doering TL. 2018. UDP-Glucuronic acid  
744 transport is required for virulence of *Cryptococcus neoformans*. *mBio* 9(1):e02319-  
745 17.
- 746 49. Li LX, Rautengarten C, Heazlewood JL, Doering TL. 2018. Xylose donor transport  
747 is critical for fungal virulence. *PLOS Pathogens* 14(1):e1006765.
- 748 50. Brouwer AE, Rajanuwong A, Chierakul W, Griffin GE, Larsen RA, White NJ,  
749 Harrison TS. 2004. Combination antifungal therapies for HIV-associated  
750 cryptococcal meningitis: a randomised trial. *Lancet* 363:1764–1767.
- 751 51. Bicanic T, Muzoora C, Brouwer AE, Meintjes G, Longley N, Taseera K, Rebe K,  
752 Loyse A, Jarvis J, Bekker L-G, Wood R, Limmathurotsakul D, Chierakul W,  
753 Stepniewska K, White NJ, Jaffar S, Harrison TS. 2009. Independent association  
754 between rate of clearance of infection and clinical outcome of HIV-associated  
755 cryptococcal meningitis: analysis of a combined cohort of 262 patients. *Clin Infect*  
756 *Dis* 49:702–709.
- 757 52. Jarvis JN, Bicanic T, Loyse A, Namarika D, Jackson A, Nussbaum JC, Longley N,  
758 Muzoora C, Phulusa J, Taseera K, Kanyembe C, Wilson D, Hosseinipour MC,  
759 Brouwer AE, Limmathurotsakul D, White N, van der Horst C, Wood R, Meintjes G,  
760 Bradley J, Jaffar S, Harrison T. 2014. Determinants of mortality in a combined  
761 cohort of 501 patients with HIV-associated Cryptococcal meningitis: implications for  
762 improving outcomes. *Clin Infect Dis* 58:736–745.
- 763 53. Jung WH, Sham A, Lian T, Singh A, Kosman DJ, Kronstad JW. 2008. Iron source  
764 preference and regulation of iron uptake in *Cryptococcus neoformans*. *PLOS*  
765 *Pathogens* 4(2):e45.
- 766 54. Nichols CB, Ost KS, Grogan DP, Pianalto K, Hasan S, Alspaugh JA. 2015. Impact  
767 of protein palmitoylation on the virulence potential of *Cryptococcus neoformans*.  
768 *Eukaryotic Cell* 14:626–635.



- 769 55. Fu C, Donadio N, Cardenas ME, Heitman J. 2018. Dissecting the roles of the  
770 calcineurin pathway in unisexual reproduction, stress responses, and virulence in  
771 *Cryptococcus deneoformans*. *Genetics* 208:639–653.
- 772 56. Horianopoulos LC, Hu G, Caza M, Schmitt K, Overby P, Johnson JD, Valerius O,  
773 Braus GH, Kronstad JW. 2020. The novel J-Domain protein Mrj1 is required for  
774 mitochondrial respiration and virulence in *Cryptococcus neoformans*. *mBio*  
775 11(3):e01127-20.
- 776 57. Okagaki LH, Wang Y, Ballou ER, O’Meara TR, Bahn Y-S, Alspaugh JA, Xue C,  
777 Nielsen K. 2011. Cryptococcal titan cell formation is regulated by G-Protein  
778 signaling in response to multiple stimuli. *Eukaryot Cell* 10:1306–1316.
- 779 58. Trevijano-Contador N, Oliveira HC de, García-Rodas R, Rossi SA, Llorente I,  
780 Zaballos Á, Janbon G, Ariño J, Zaragoza Ó. 2018. *Cryptococcus neoformans* can  
781 form titan-like cells in vitro in response to multiple signals. *PLOS Pathogens*  
782 14(5):e1007007.
- 783 59. Perfect JR, Lang SD, Durack DT. 1980. Chronic cryptococcal meningitis: a new  
784 experimental model in rabbits. *Am J Pathol* 101:177–194.
- 785 60. Muszewska A, Steczkiewicz K, Stepniewska-Dziubinska M, Ginalski K. 2017. Cut-  
786 and-paste transposons in fungi with diverse lifestyles. *Genome Biology and*  
787 *Evolution* 9:3463–3477.
- 788 61. Iyer LM, Zhang D, de Souza RF, Pukkila PJ, Rao A, Aravind L. 2014. Lineage-  
789 specific expansions of TET/JBP genes and a new class of DNA transposons shape  
790 fungal genomic and epigenetic landscapes. *Proc Natl Acad Sci USA* 111:1676–  
791 1683.
- 792 62. Li H, Li Y, Sun T, Du W, Li C, Suo C, Meng Y, Liang Q, Lan T, Zhong M, Yang S,  
793 Niu C, Li D, Ding C. 2019. Unveil the transcriptional landscape at the  
794 *Cryptococcus*-host axis in mice and nonhuman primates. *PLOS Neglected Tropical*  
795 *Diseases* 13(7):e0007566.

- 796 63. Burke JE, Longhurst AD, Merkurjev D, Sales-Lee J, Rao B, Moresco JJ, Yates JR,  
797 Li JJ, Madhani HD. 2018. Spliceosome profiling visualizes operations of a dynamic  
798 RNP at nucleotide resolution. *Cell* 173:1014-1030.e17.
- 799 64. Moyrand F, Klaproth B, Himmelreich U, Dromer F, Janbon G. 2002. Isolation and  
800 characterization of capsule structure mutant strains of *Cryptococcus neoformans*.  
801 *Mol Microbiol* 45:837–849.
- 802 65. Li LX, Hole CR, Rangel-Moreno J, Khader SA, Doering TL. 2020. *Cryptococcus*  
803 *neoformans* evades pulmonary immunity by modulating xylose precursor transport.  
804 *Infect Immun* 88(8):e00288-20.
- 805 66. Vanhove M, Beale MA, Rhodes J, Chanda D, Lakhi S, Kwenda G, Molloy S,  
806 Karunaharan N, Stone N, Harrison TS, Bicanic T, Fisher MC. 2017. Genomic  
807 epidemiology of *Cryptococcus* yeasts identifies adaptation to environmental niches  
808 underpinning infection across an African HIV/AIDS cohort. *Molecular Ecology*  
809 26:1991–2005.
- 810 67. Ashton PM, Thanh LT, Trieu PH, Van Anh D, Trinh NM, Beardsley J, Kibengo F,  
811 Chierakul W, Dance DAB, Rattanavong S, Davong V, Hung LQ, Chau NVV, Tung  
812 NLN, Chan AK, Thwaites GE, Laloo DG, Anscombe C, Nhat LTH, Perfect J,  
813 Dougan G, Baker S, Harris S, Day JN. 2019. Three phylogenetic groups have  
814 driven the recent population expansion of *Cryptococcus neoformans*. *Nature*  
815 *Communications* 10(1):2035.
- 816 68. Litvintseva AP, Carbone I, Rossouw J, Thakur R, Govender NP, Mitchell TG. 2011.  
817 Evidence that the human pathogenic fungus *Cryptococcus neoformans* var. *grubii*  
818 may have evolved in Africa. *PLoS ONE* 6(5):e19688.
- 819 69. Khayhan K, Hagen F, Pan W, Simwami S, Fisher MC, Wahyuningsih R,  
820 Chakrabarti A, Chowdhary A, Ikeda R, Taj-Aldeen SJ, Khan Z, Ip M, Imran D, Sjam  
821 R, Sriburee P, Liao W, Chaicumpar K, Vuddhakul V, Meyer W, Trilles L, Iersel LJJ  
822 van, Meis JF, Klaassen CHW, Boekhout T. 2013. Geographically structured

- 823 populations of *Cryptococcus neoformans* variety *grubii* in Asia correlate with HIV  
824 status and show a clonal population structure. PLOS ONE 8:e72222.
- 825 70. Andrade-Silva LE, Ferreira-Paim K, Ferreira TB, Vilas-Boas A, Mora DJ, Manzato  
826 VM, Fonseca FM, Buosi K, Andrade-Silva J, Prudente B da S, Araujo NE, Sales-  
827 Campos H, Silva MV da, Júnior VR, Meyer W, Silva-Vergara ML. 2018. Genotypic  
828 analysis of clinical and environmental *Cryptococcus neoformans* isolates from  
829 Brazil reveals the presence of VNB isolates and a correlation with biological  
830 factors. PLOS ONE 13(3):e0193237.
- 831 71. Palma-Guerrero J, Hall CR, Kowbel D, Welch J, Taylor JW, Brem RB, Glass NL.  
832 2013. Genome wide association identifies novel loci involved in fungal  
833 communication. PLoS Genetics 9(8):e1003669.
- 834 72. Gao Y, Liu Z, Faris JD, Richards J, Brueggeman RS, Li X, Oliver RP, McDonald  
835 BA, Friesen TL. 2016. Validation of genome-wide association studies as a tool to  
836 identify virulence factors in *Parastagonospora nodorum*. Phytopathology  
837 106:1177–1185.
- 838 73. Alanio A, Vernel-Pauillac F, Sturny-Leclère A, Dromer F. 2015. *Cryptococcus*  
839 *neoformans* host adaptation: toward biological evidence of dormancy. mBio  
840 6(2):e02580-14.
- 841 74. Hommel B, Sturny-Leclère A, Volant S, Veluppillai N, Duchateau M, Yu C-H,  
842 Hourdel V, Varet H, Matondo M, Perfect JR, Casadevall A, Dromer F, Alanio A.  
843 2019. *Cryptococcus neoformans* resists to drastic conditions by switching to viable  
844 but non-culturable cell phenotype. PLOS Pathogens 15(7):e1007945.
- 845 75. Yang F, Teoh F, Tan ASM, Cao Y, Pavelka N, Berman J. 2019. Aneuploidy  
846 enables cross-adaptation to unrelated drugs. Molecular Biology and Evolution  
847 36:1768–1782.

848 76. Torres EM, Sokolsky T, Tucker CM, Chan LY, Boselli M, Dunham MJ, Amon A.  
849 2007. Effects of aneuploidy on cellular physiology and cell division in haploid yeast.  
850 Science 317:916–924.

851

## 852 **Data Availability**

853 Isolate sequence data can be accessed in NCBI via accession PRJNA764746.

## 854 **Ethics**

855 The ACTA trial from which the isolates described here were collected had ethical  
856 approval from the London School of Hygiene and Tropical Medicine Research Ethics  
857 Committee and by all the site national research ethics committees and regulatory  
858 bodies. De-identified clinical metadata (fungal burden, fungal clearance (EFA), patient  
859 outcome) was provided by investigators for analysis performed here.

## 860 **Acknowledgments**

861 We thank the Broad Institute Genomics Platform for generating the sequence data for  
862 this study. We thank all of the patients and their families, as well as the staff at all the  
863 sites not directly involved in the ACTA trial; Andrew Nunn, Halima Dawood, Andrew  
864 Kitua, and William Powderly for serving on the data and safety monitoring committee;  
865 Graeme Meintjes, Calice Talom, Newton Kumwenda, and Maryline Bonnet for serving  
866 on the trial steering committee; and the ANRS Staff in Paris (Brigitte Bazin, Claire  
867 Rekacewicz, and Paula Garcia) for constant support.

## 868 **Funding**

869 This project has been funded in part with Federal funds from the National Institute of  
870 Allergy and Infectious Diseases, National Institutes of Health, Department of Health and  
871 Human Services, under award U19AI110818 to the Broad Institute and Public Health  
872 Service Grants AI73896 and AI93257 to JRP. CAC is a CIFAR fellow in the Fungal  
873 Kingdom Program. RSH is a NIHR Senior Investigator. The views expressed in this

874 publication are those of the author(s) and not necessarily those of the NIHR or the  
875 Department of Health and Social Care.

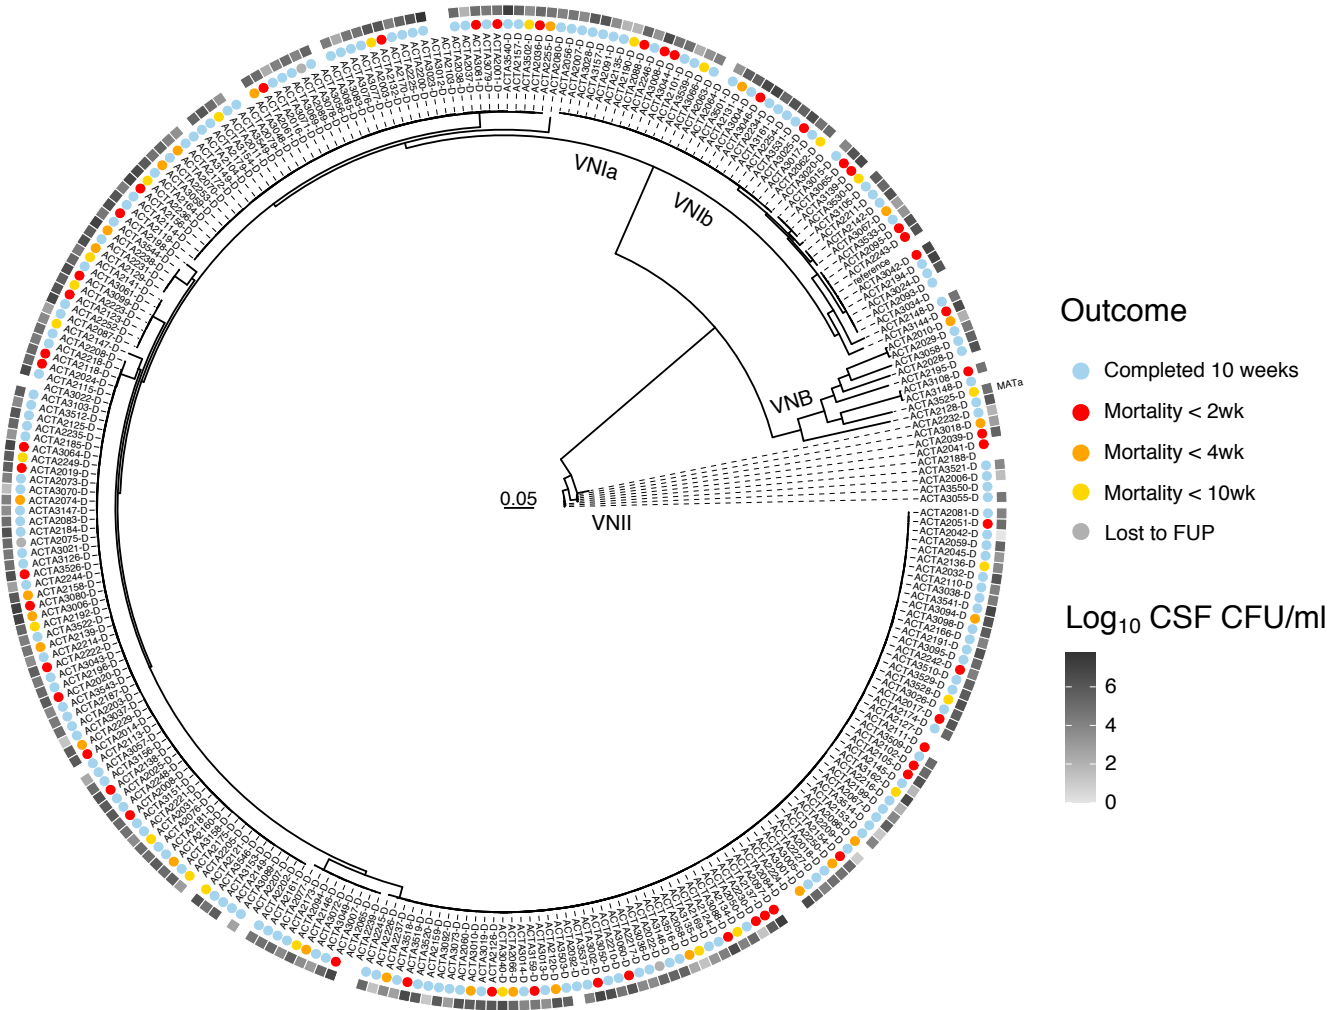

Figure 1. Maximum likelihood phylogeny of patient isolates, estimated from 72,258 segregating SNP sites, rooted to VNII. Isolates separate distinctly into VNI, VNB, and VNII, with all lineages having 100% bootstrap support. All isolates possess MAT $\alpha$  except ACTA3523 (highlighted). Colored circles correspond to patient survival. Greyscale squares indicate patient fungal burden of cerebrospinal fluid prior to treatment, Log<sub>10</sub>(CFU/ml).



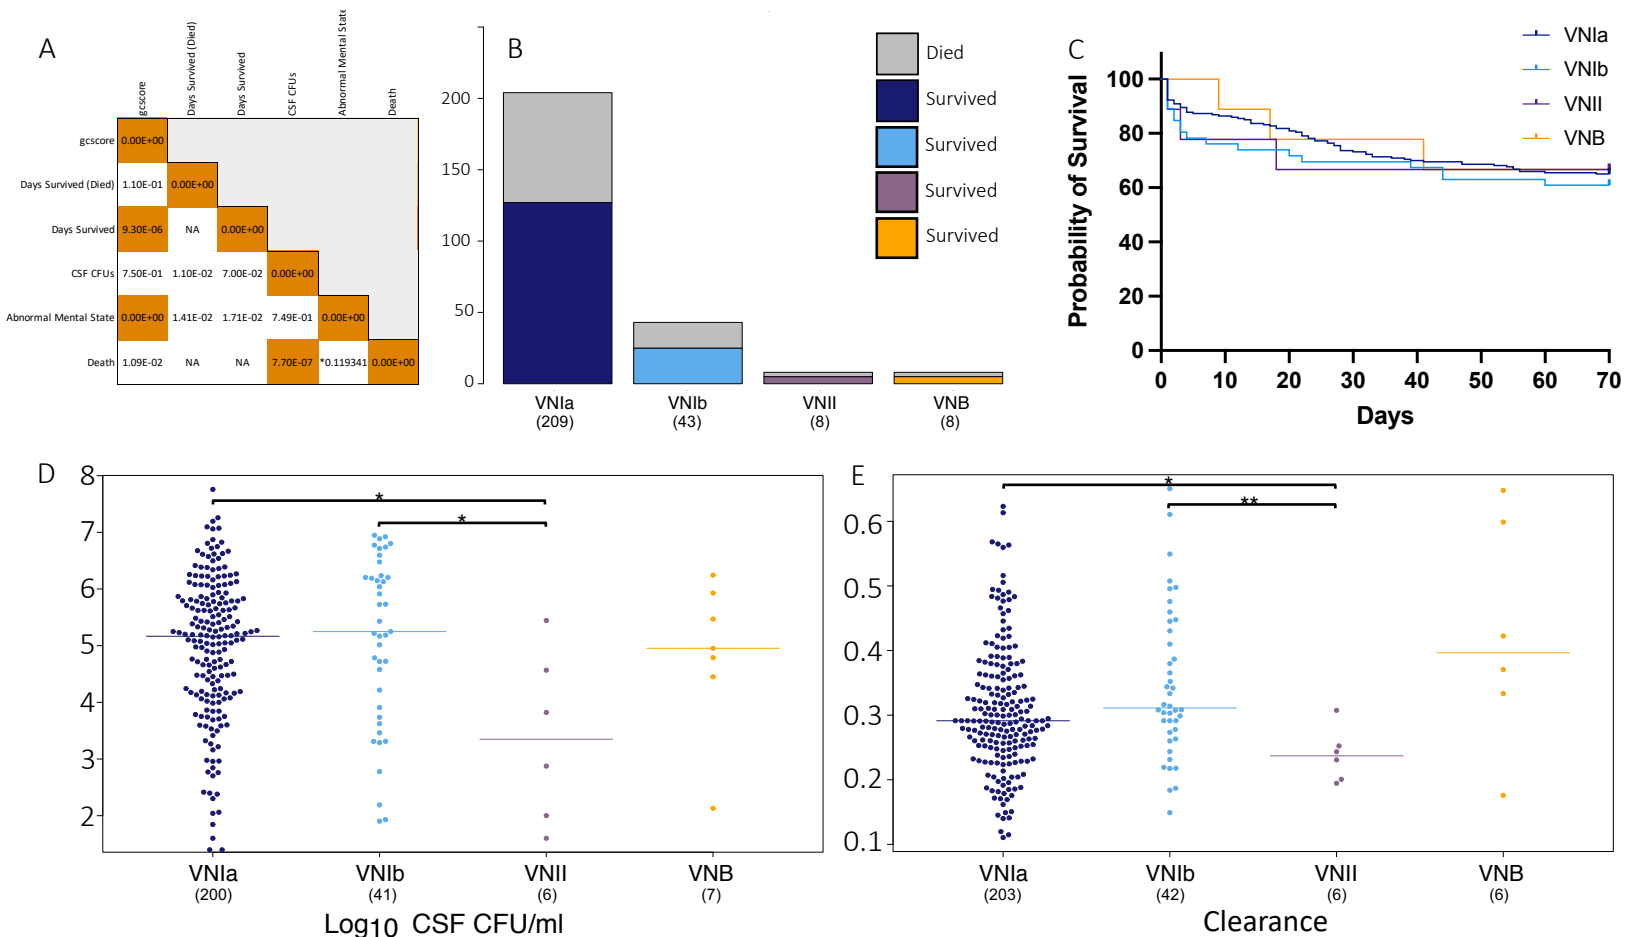

Figure 2. A) Correlation coefficient between clinical phenotypes,  $p < 0.0001$  in orange. Asterisk indicates phi coefficient. Days survived indicates the total number of days survived for all individuals. Days survived (Died) indicates the number of days survived only for individuals that died during the ACTA clinical trial. B) Deaths (top, grey) and survival (bottom) of patients by infecting isolate lineage. C) Probability of survival, by lineage of infecting isolate. D)  $\text{Log}_{10}$  CSF CFU/ml (fungal burden) by infecting isolate lineage, asterisk indicates  $p < 0.05$ , Wilcoxon test. E) Rate of clearance (EFA) by infecting isolate lineage. Displayed as  $-1(\text{gradient})$ , asterisk indicates  $p < 0.05$  and  $0.01$ , Wilcoxon test.

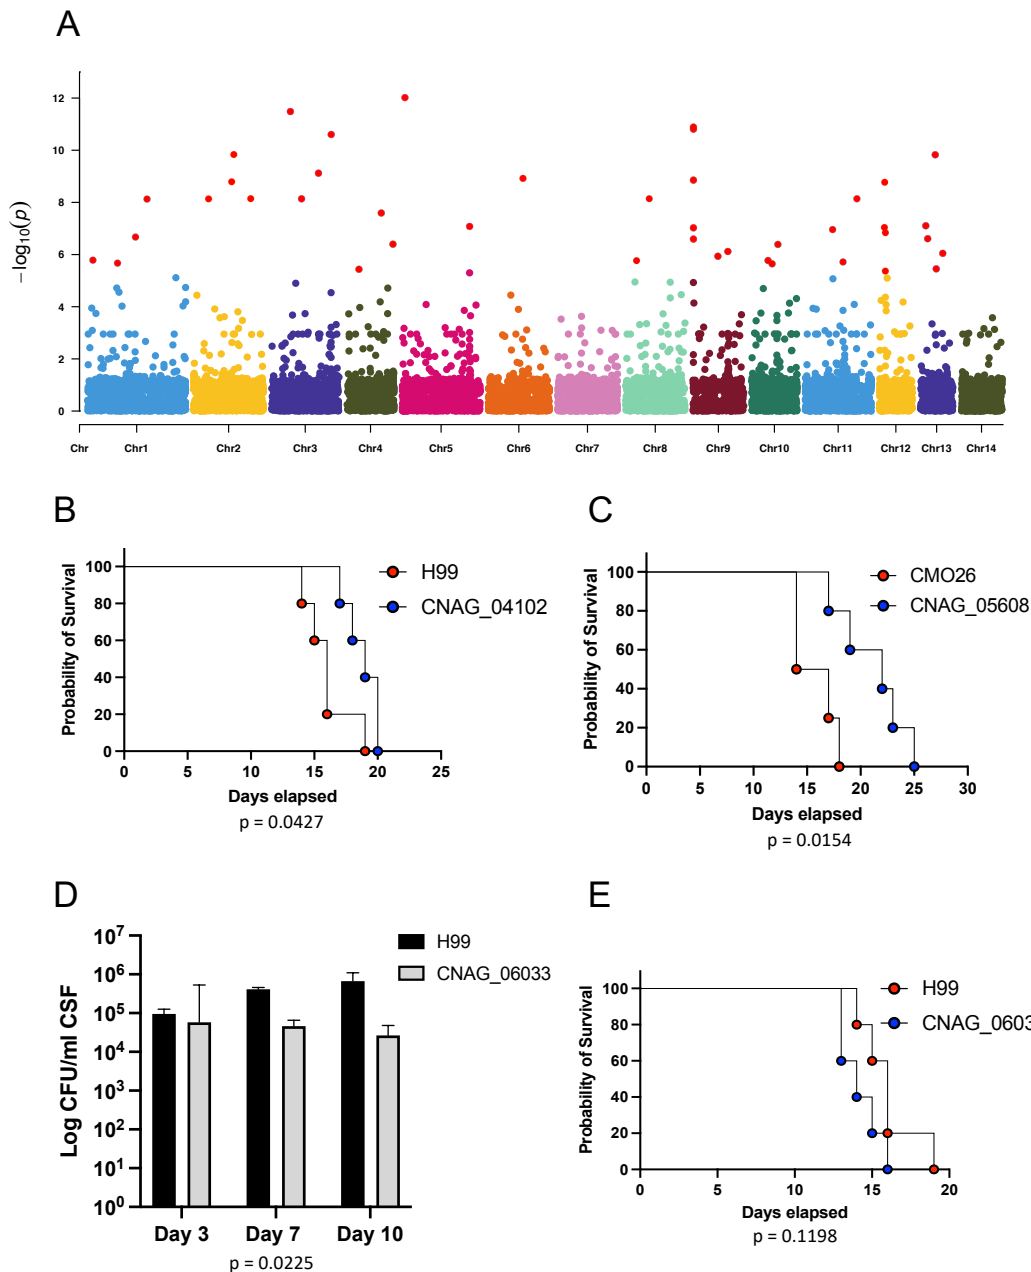

Figure 3. A) Manhattan plot displaying variants associated with high fungal burden. Variants with an association score  $< 0.000005$  (score test) are labeled in red. B) Survival of mice infected with parental strain (H99) and a CNAG\_04102 mutant strain. Five CD-1 mice were infected with approximately  $5 \times 10^4$  CFU by oropharyngeal aspiration. C) Survival of mice infected with parental strain (CM026) and a CNAG\_05608 mutant strain. Five CD-1 mice were infected with approximately  $5 \times 10^4$  CFU by oropharyngeal aspiration. One mouse infected with CNAG\_05608 was excluded from analysis as an outlier. At Day 45 of infection, this mouse was assessed for fungal burden in the lung and brain and both tissues were sterile. D) Rabbit CSF CFU's for the parental strain (H99) and a CNAG\_06033 mutant strain extracted on days 3, 7, and 10 post-infection. Three rabbits were infected per strain. E) Survival of mice infected with parental strain (H99) and a CNAG\_06033 mutant strain. Five CD-1 mice were infected with approximately  $5 \times 10^4$  CFU by oropharyngeal aspiration.

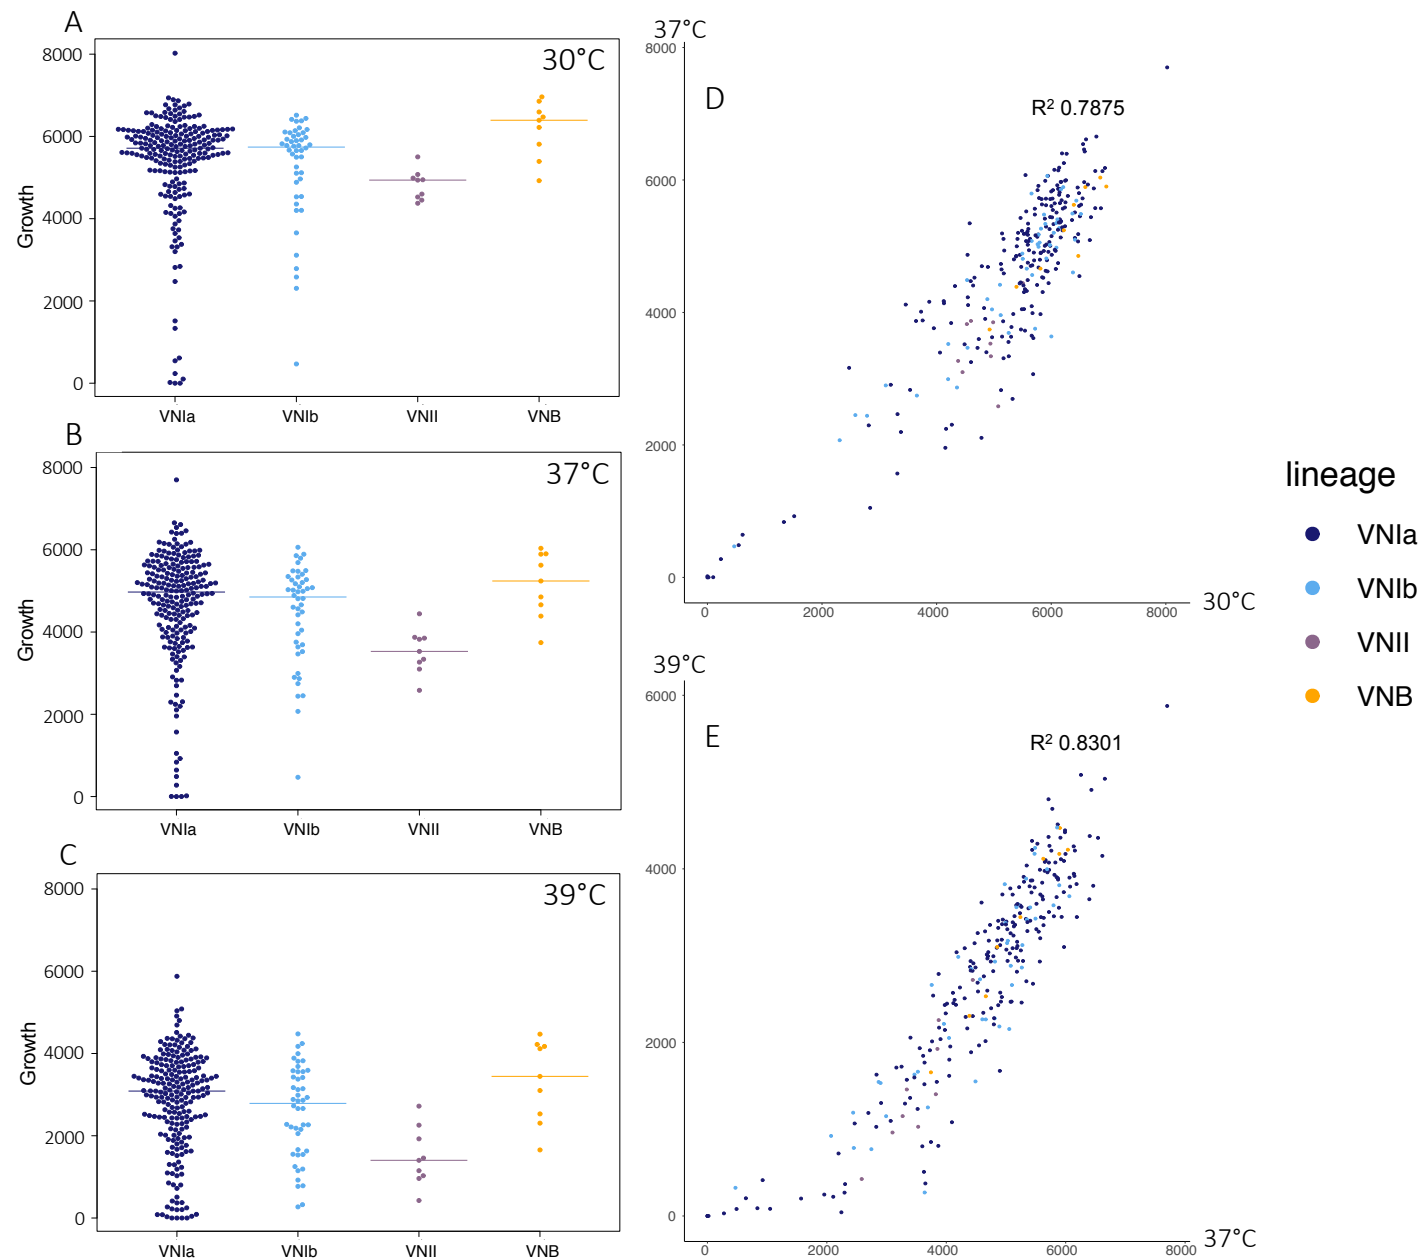

Figure 4. Colony size (area, px) of isolates grown on YPD at A) 30°C, B) 37°C, C) 39°C. Correlation of isolate growth (area, px) on YPD, with axes corresponding to colony size when grown at D) 30°C and 37°C, E) 37°C and 39°C. Colors correspond to isolate lineage: VNIa (dark blue), VNIb (light blue), VNII (purple), VNB (orange).

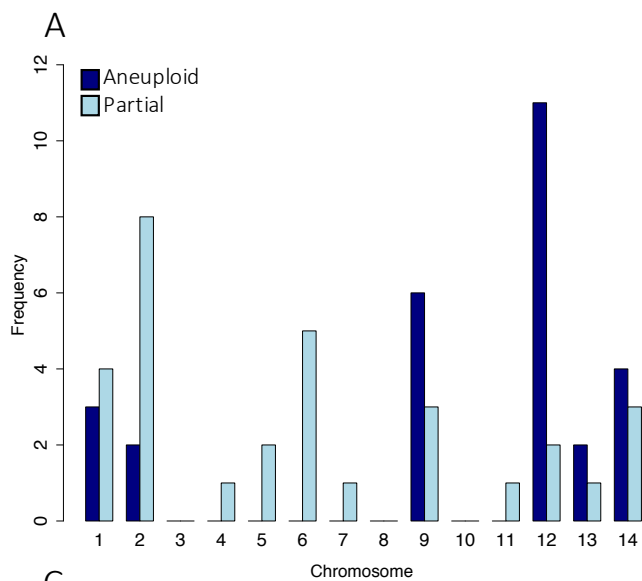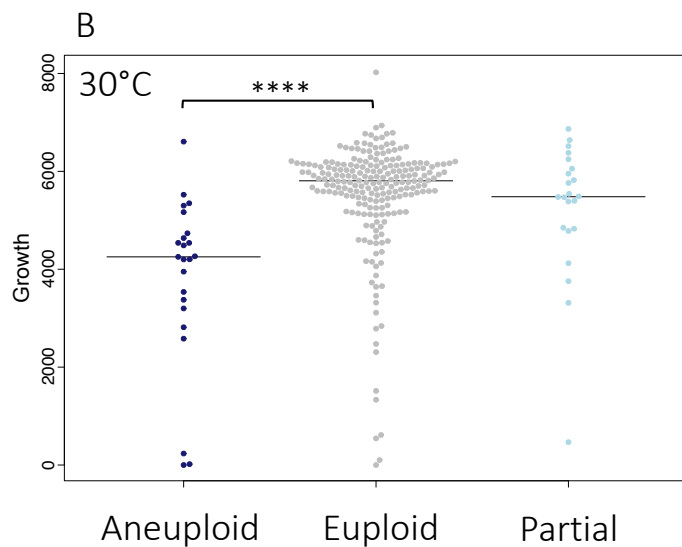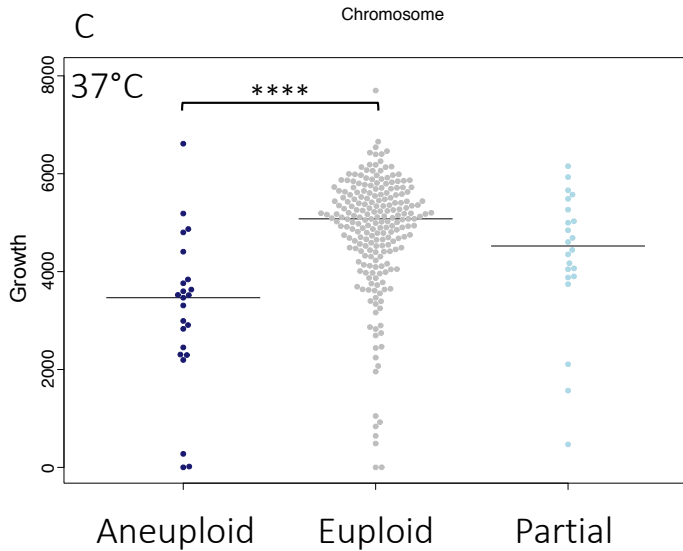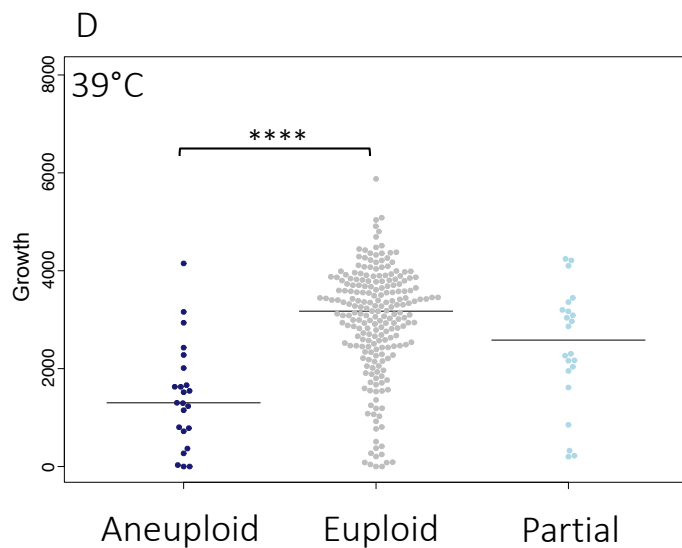

Figure 5. A) Whole (aneuploid) and partial chromosomal duplication frequency throughout the population, by chromosome. Colony size (growth) on YPD, by ploidy state at B) 30°C, C) 37°C. D) 39°C.
